# Supplementary material
Source: PubMed Central journal article supplement (PMC2779131)
Supplement: supp_122_23_4296__11.pdf [file supp_122_23_4296__11.pdf]

Table S1

|           |                                                            |
|-----------|------------------------------------------------------------|
| pmDEVD    | Palmitoylation- sselsg <b>devd</b> gssgsefsstg-Fluorophore |
| pmControl | Palmitoylation-sselsggssgstg-Fluorophore                   |
| erDEVD    | Sec63(1-68)-sselsg <b>devd</b> gssgstg-Fluorophore-NLS(3)  |
| erControl | Sec63(1-68)- sselsggssgstg -Fluorophore-NLS(3)             |
| FRET-DEVD | CyPet-sselsg <b>devd</b> gssgsef-yPet                      |

Table S2

|                           |                                                                                                  |
|---------------------------|--------------------------------------------------------------------------------------------------|
| Mem forward primer        | GCGCGCTAGCAATAGATCTTGTTTAGTGAACATGCTGTGC<br>TGTATGAGA                                            |
| Me reverse primer         | GATGAGGACCAAAAGATCTCATCGTCTGAATTGTCTGGTG<br>ATGAAGTTGATGGAT CTTCTGGTTCTGAATTCGCGC                |
| Fp forward primer         | GCGCGAATTCTCATCTACCGGTATGGTGAGCAAGGGCGA<br>G                                                     |
| Fp reverse primer         | ATGGACGAGCTGTACAAGCTCGAGCATAACTAAGGATCC<br>GCGC                                                  |
| Pm Control forward primer | GCGCGCTAGCAATAGATCTTGTTTAGTGAACATGCTGTGC<br>TGTATGAGA                                            |
| Pm control reverse primer | GATGAGGACCAAAAGATCTCATCGTCTGAATTGTCTGGTG<br>GATCTTCTGGTTCTGAATTCGCGC                             |
| Nes forward primers       | GCGCGCTAGCAATAGATCTTGTTTAGTGAACATGAACCTG<br>GTGGACCTC                                            |
| Nes reverse primer        | GAGCTGGACGAGCAGCAGGAATTCTCATCGTCTGAATTG<br>TCTGGTGATGAAGTTGATGGATCTTCTGGTTCTTCATCTA<br>CCGGTGCGC |
| Fp forward primer         | GCGCACCGGTATGGTGAGCAAGGGCGAG                                                                     |
| Fp reverse primer         | ATGGACGAGCTGTACAAGCTCGAGCATAACTAAGGATCC<br>GCGC                                                  |
| Nls forward primer        | GCGCCTCGAGTCTGATCCAAAAAAGAAGAGA                                                                  |
| Nls reverse primer        | GGATCCACCGGATCTAGATAAGGATCCGCGC                                                                  |
| Nes control primer        | GCGCGAATTCTCATCGTCTGAATTGTCTGGTGGATCTTCT<br>GGTTCT                                               |
| Nes control primer        | ATGGACGAGCTGTACAAGCTCGAGCATAACTAAGGATCC<br>GCGC                                                  |
| erDEVD forward primer     | GCGCGCTAGCATGGCCGGGCAGCAGTTC                                                                     |
| Er DEVD reverse primer    | TGGTATCGTAAGCTTTCTGAATTCGCGC                                                                     |
| FRET 1F                   | GCGCGCTAGCATGGTGAGCAAGGGAGAG                                                                     |
| FRET 1R                   | ATGGACGAAGTGTACAAATCCTCGTCCGAGCTCAGCGGA<br>GATGAGGTGATGGATCCCCAAA                                |
| FRET 2F                   | TTTGGGGATCCAGCGGAAGCGAATTCTTCAACCGGTAT<br>GGTGAGCAAAGGCGAAGAG                                    |
| FRET 2R                   | AACGAGCTCTATAAGTAAAAGCTTGCGC                                                                     |
| PSLD F                    | GCGCCTCGAGCTTCTAGCGGCGCACCTCCA                                                                   |
| PSLD R                    | GATAATCAAGAACTTAGGAATTCGCGC                                                                      |
