# Supplementary material
Source: PubMed Central journal article supplement (PMC2779131)

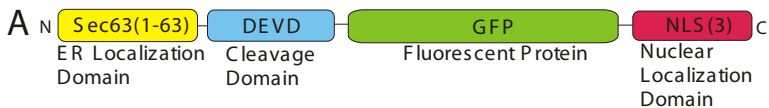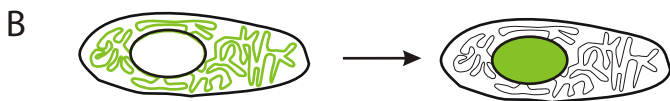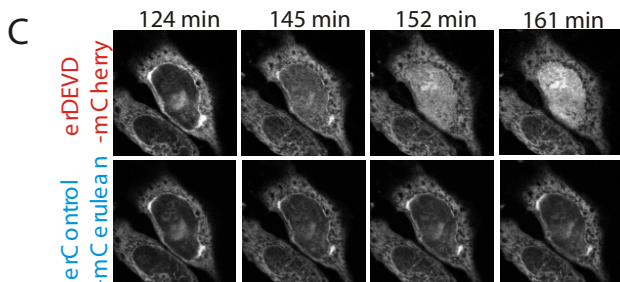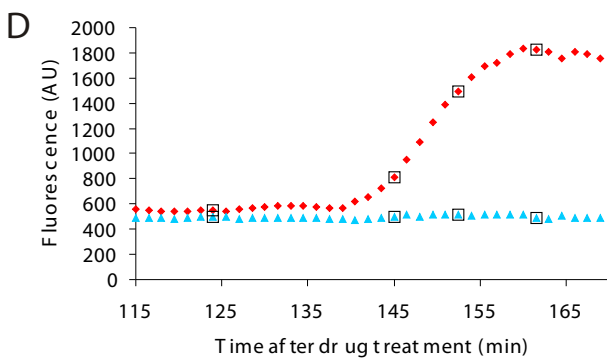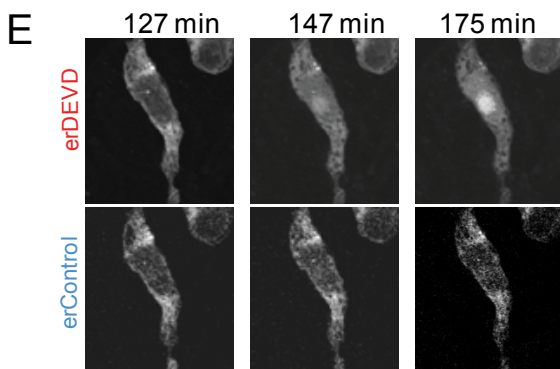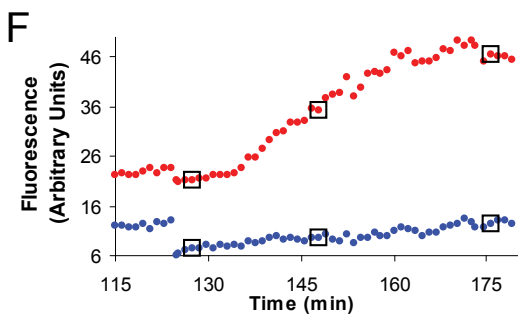

Supplement: supp_122_23_4296__1.pdf [file supp_122_23_4296__1.pdf]

A

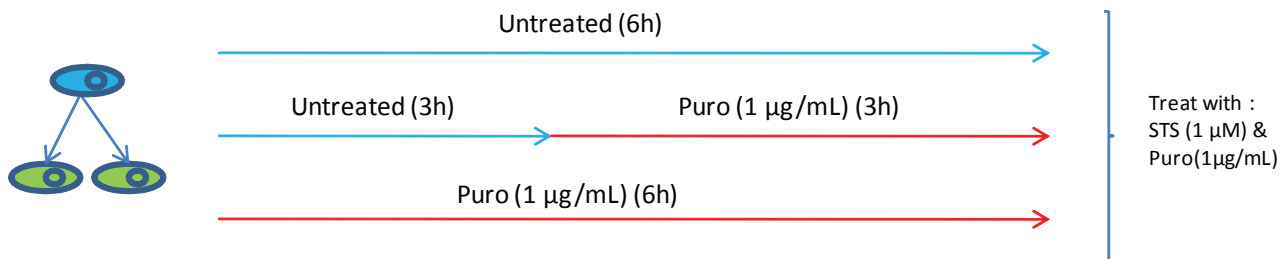

B

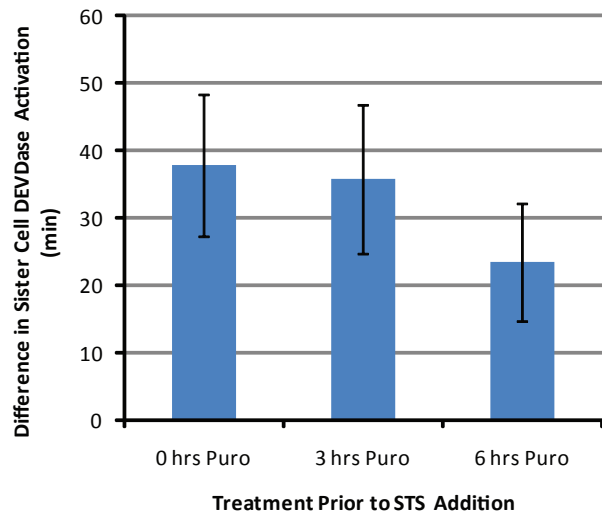

C

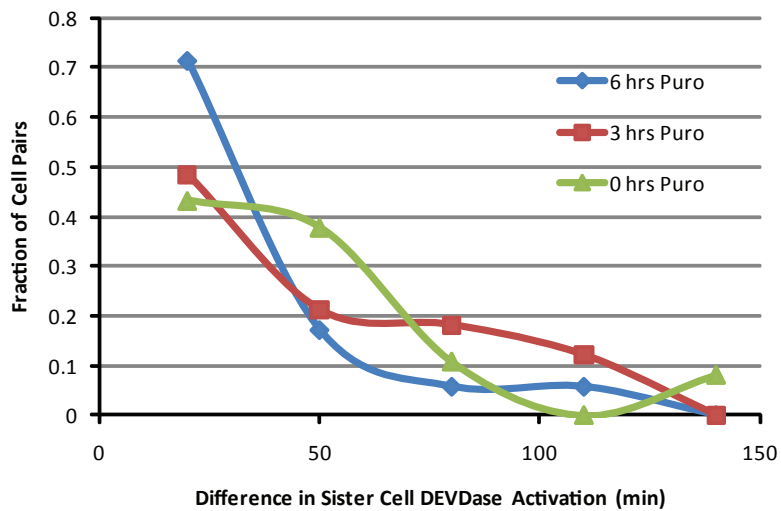

D

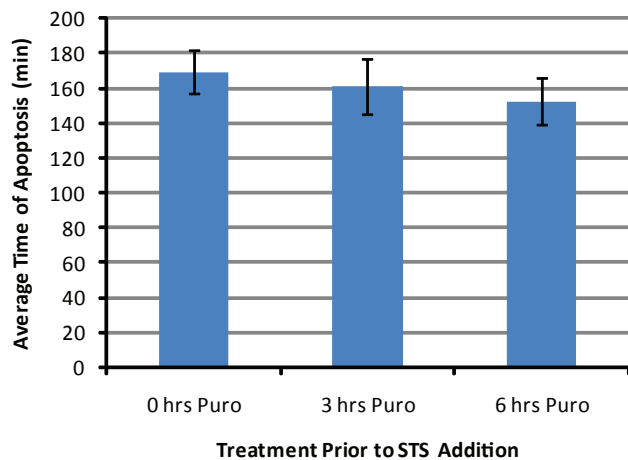

E

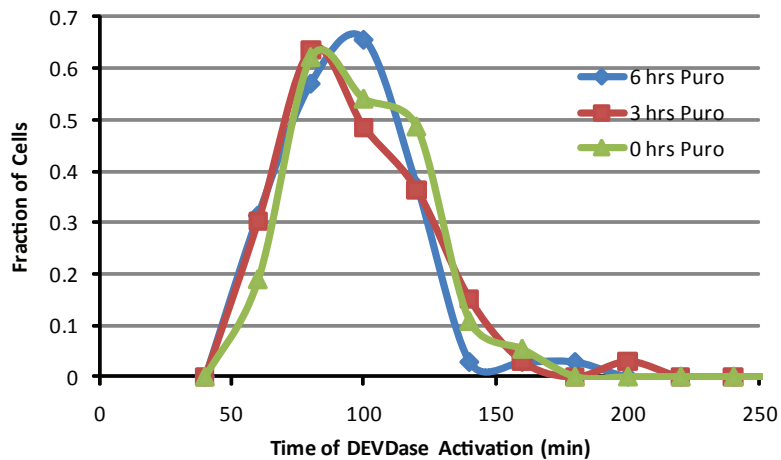

Supplement: supp_122_23_4296__10.pdf [file supp_122_23_4296__10.pdf]

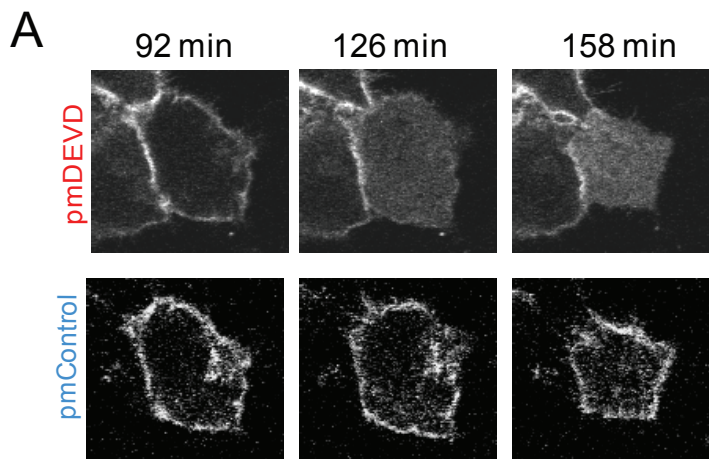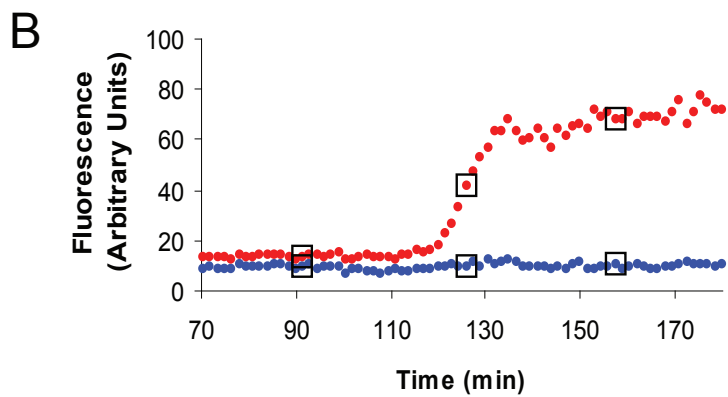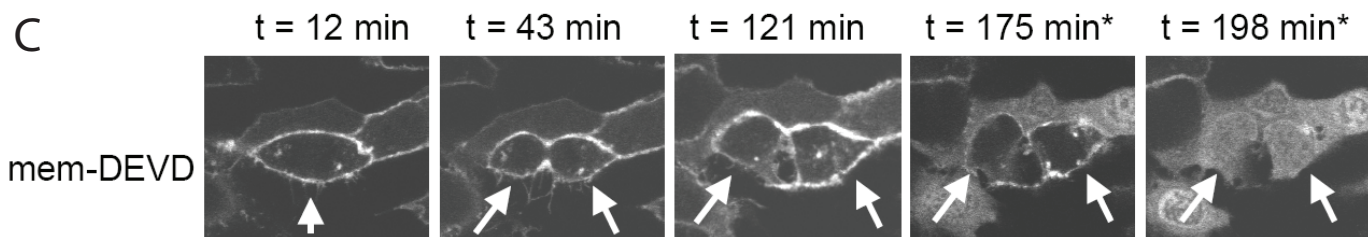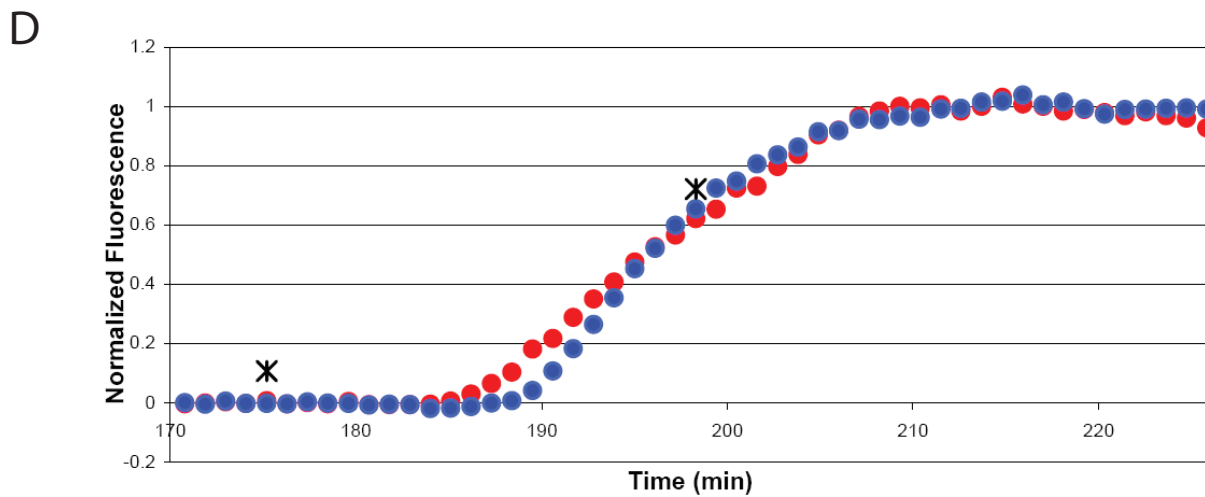

Supplement: supp_122_23_4296__2.pdf [file supp_122_23_4296__2.pdf]

A pmDEVD-mCherry

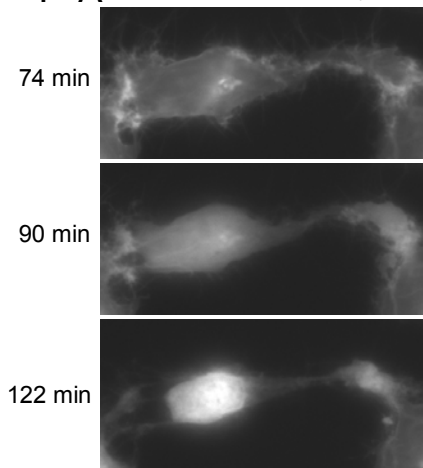

B

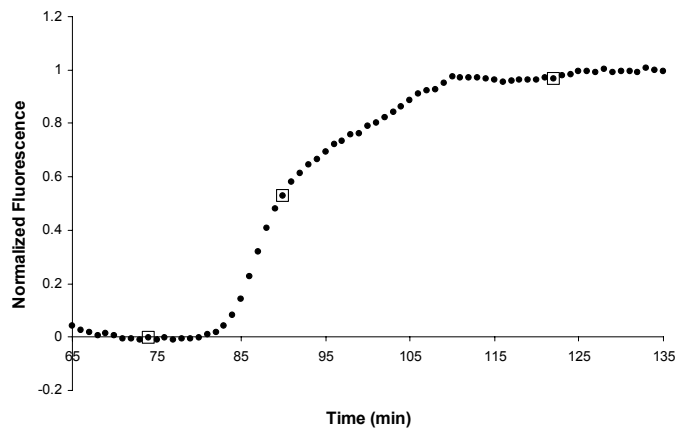

C

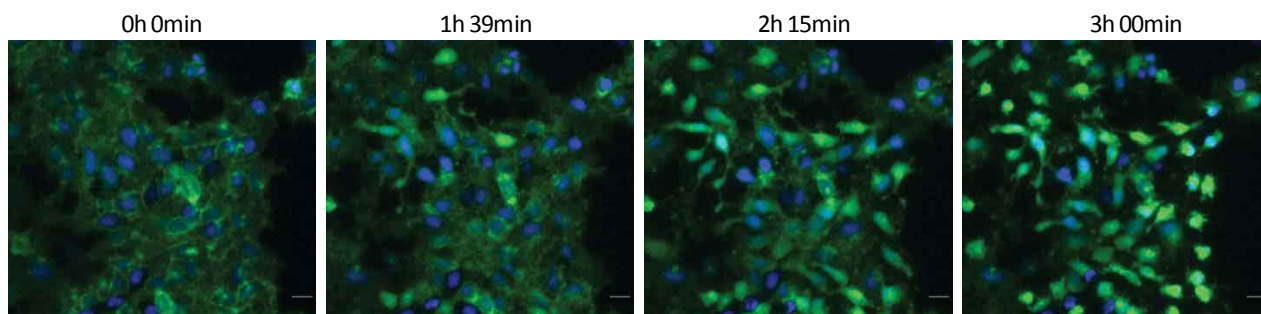

D

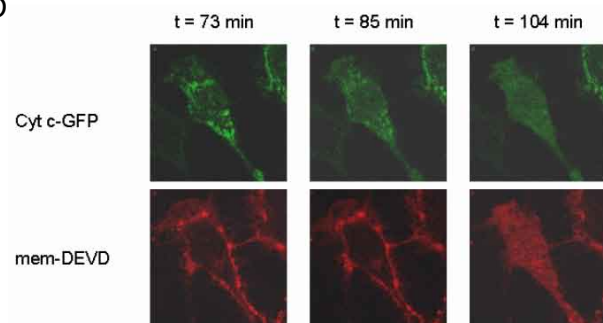

E

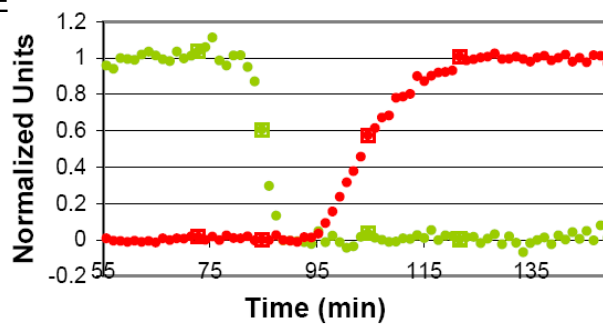

Supplement: supp_122_23_4296__3.pdf [file supp_122_23_4296__3.pdf]

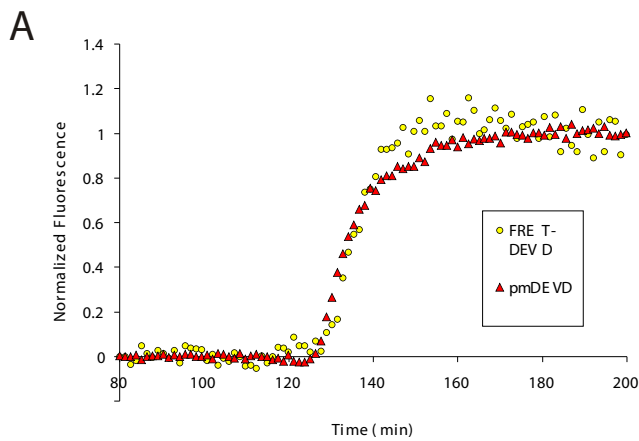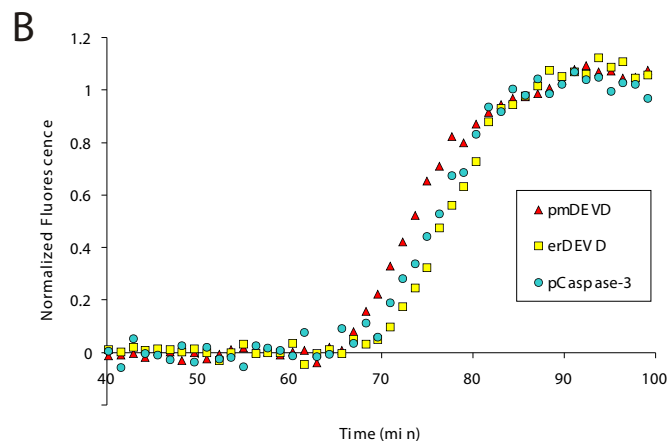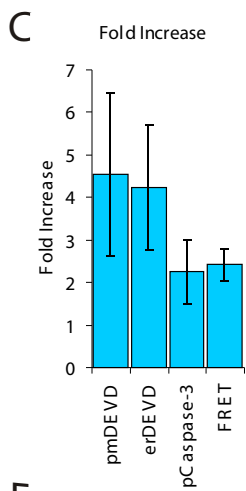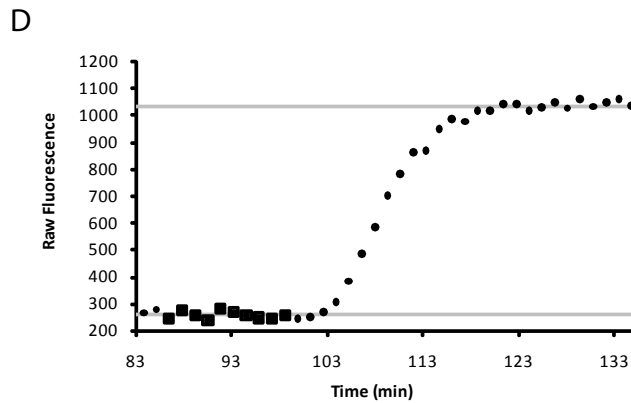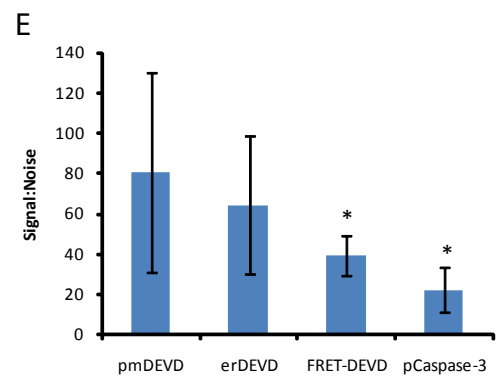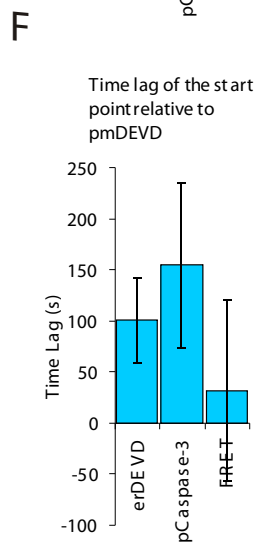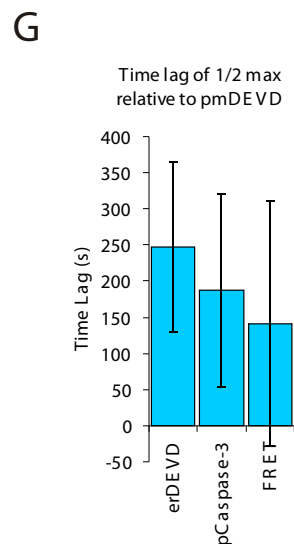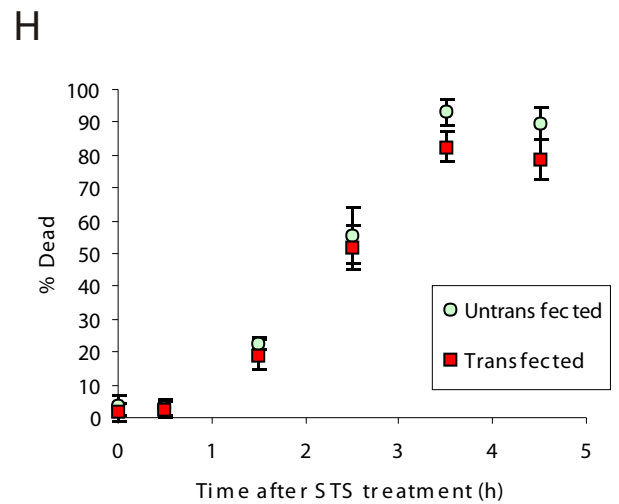

Supplement: supp_122_23_4296__4.pdf [file supp_122_23_4296__4.pdf]

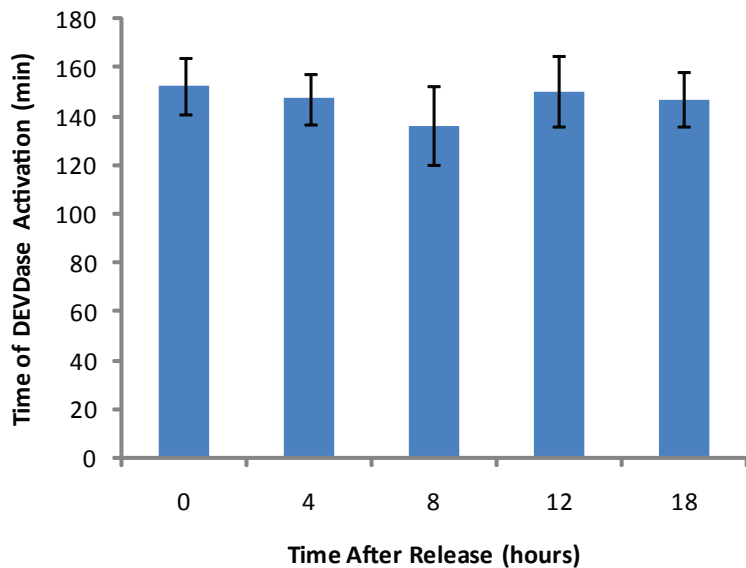

Supplement: supp_122_23_4296__5.pdf [file supp_122_23_4296__5.pdf]

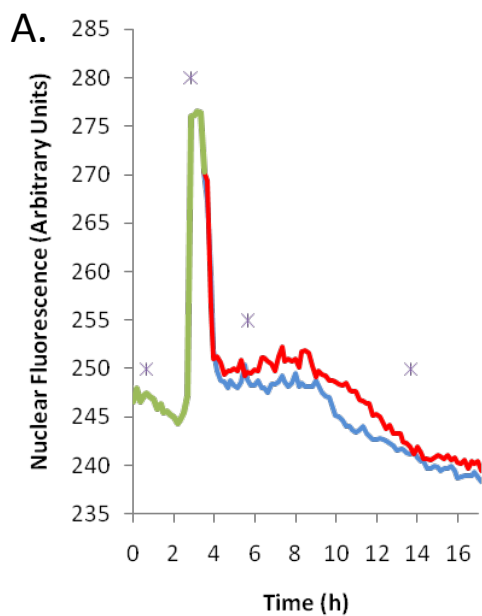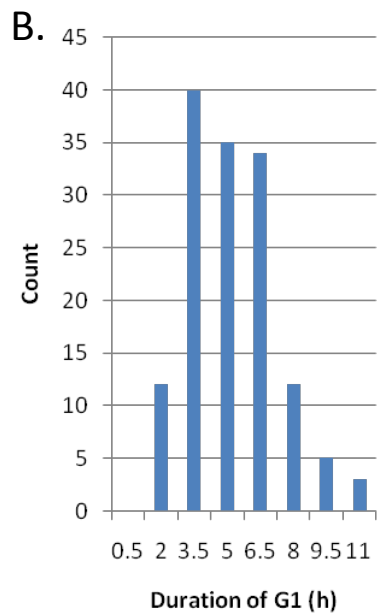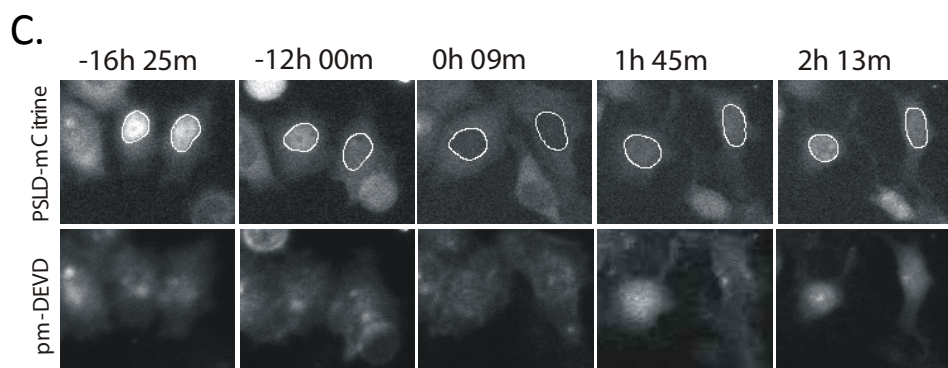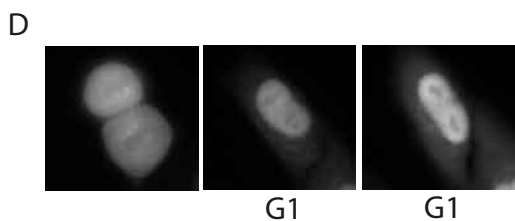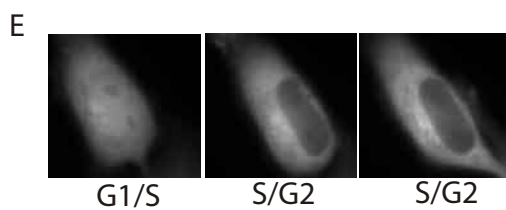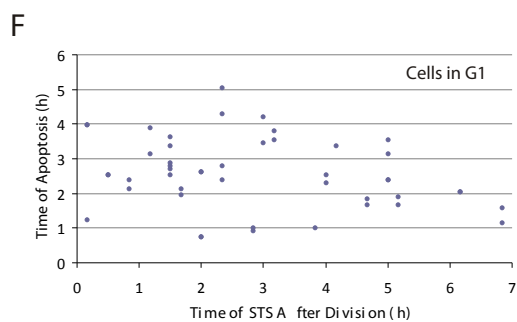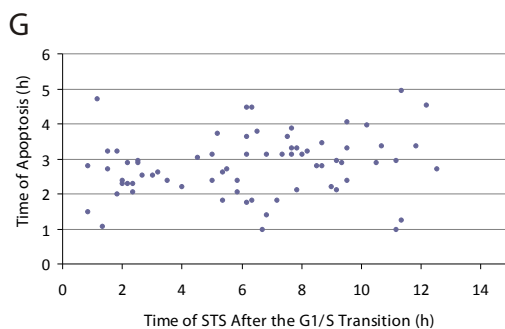

Supplement: supp_122_23_4296__6.pdf [file supp_122_23_4296__6.pdf]

A

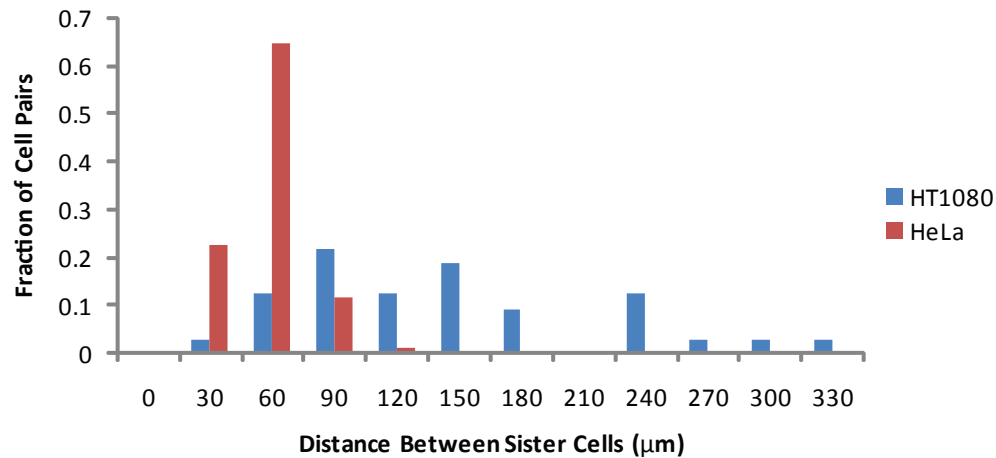

B

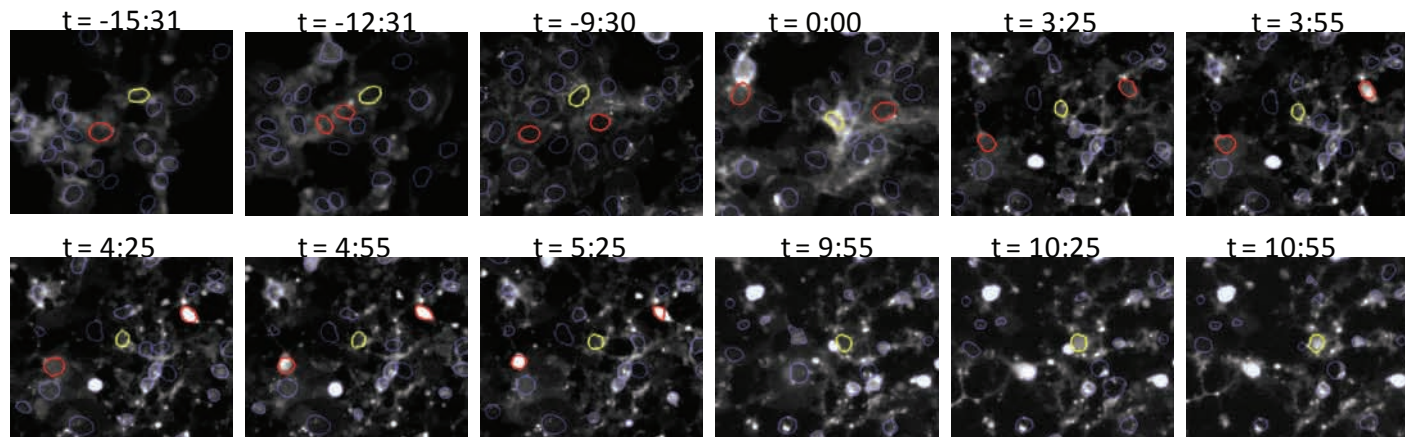

C

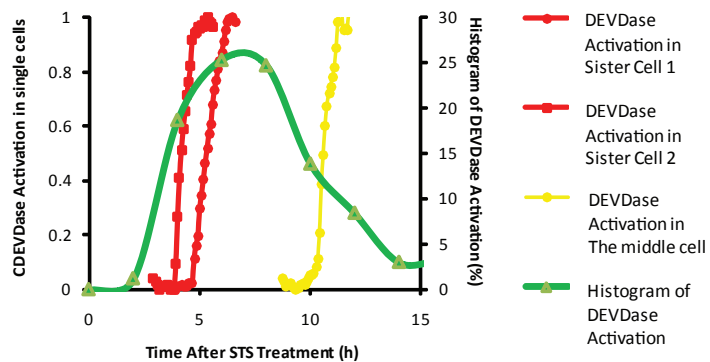

D

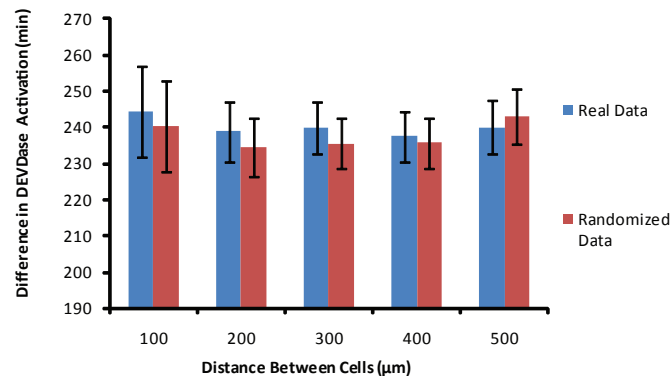

Supplement: supp_122_23_4296__7.pdf [file supp_122_23_4296__7.pdf]

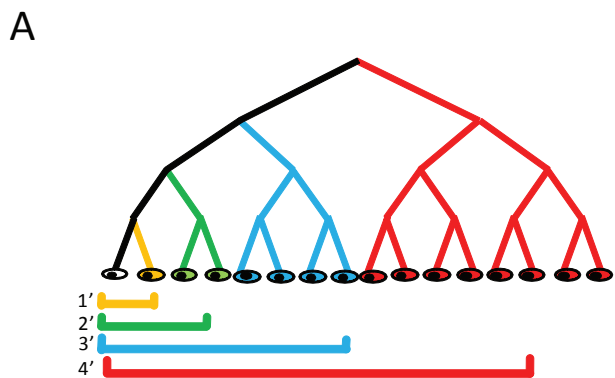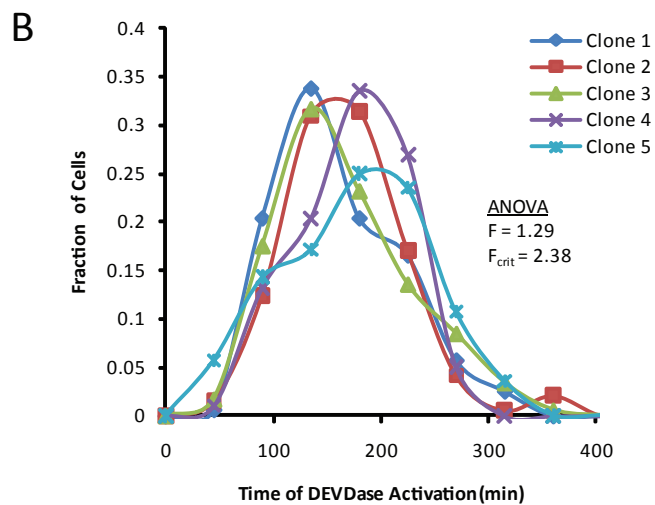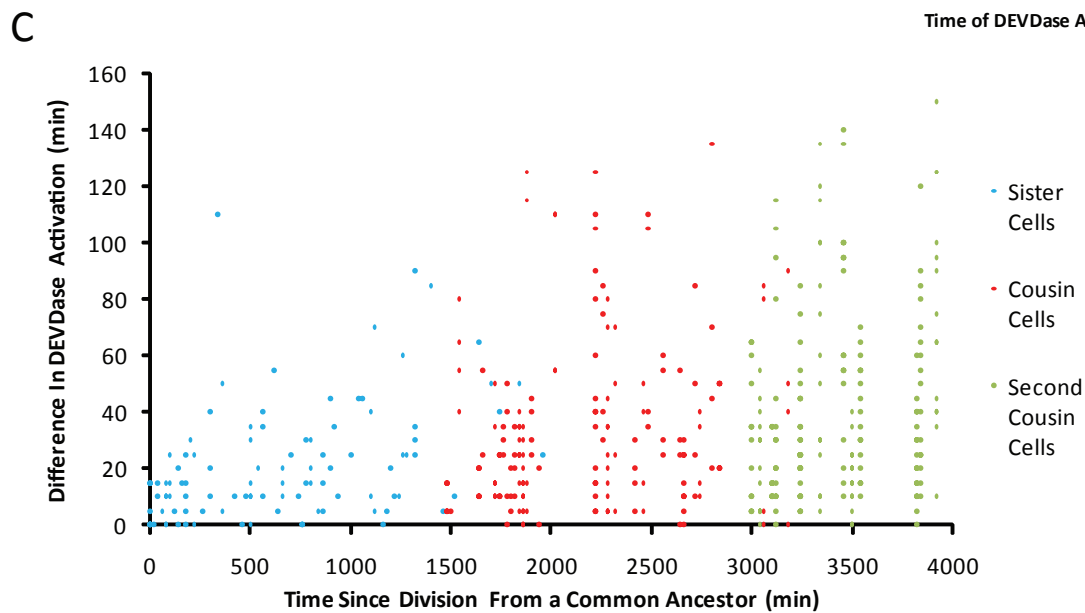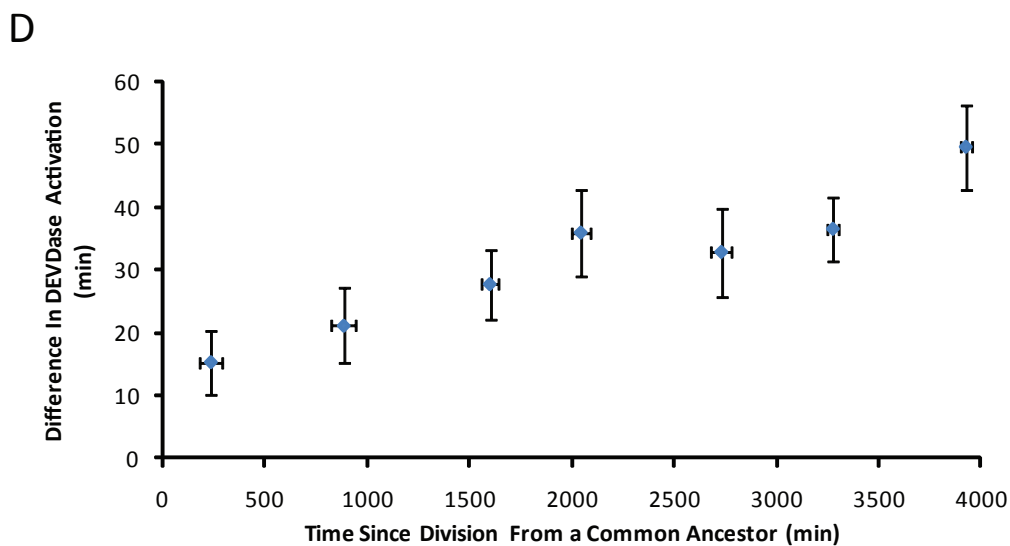

Supplement: supp_122_23_4296__8.pdf [file supp_122_23_4296__8.pdf]

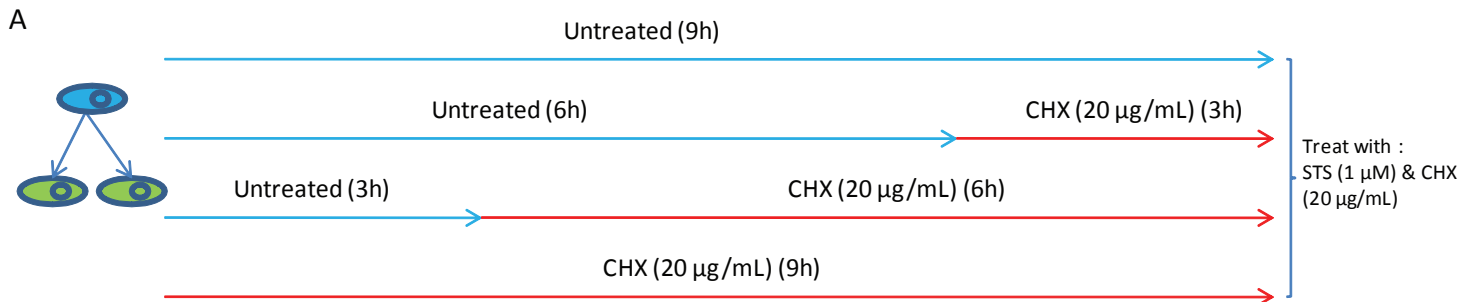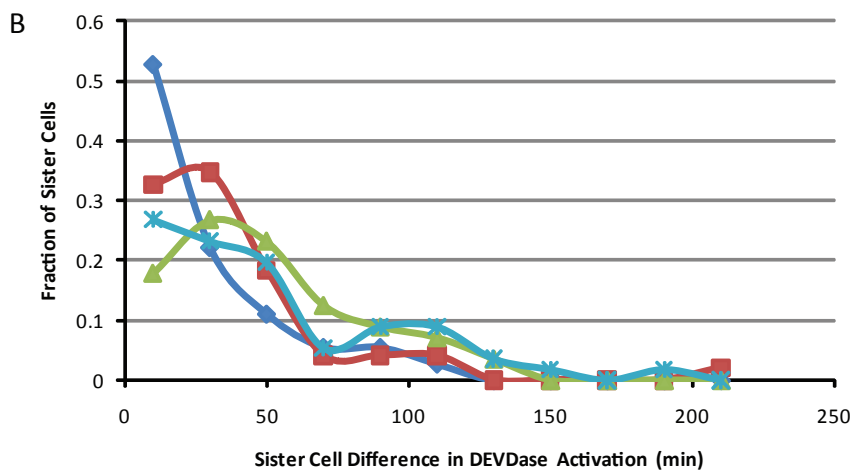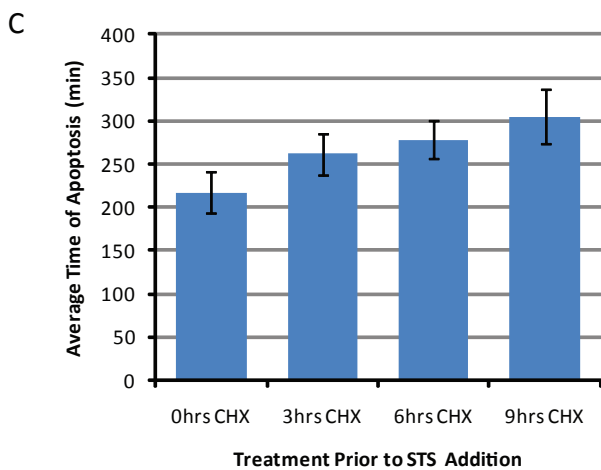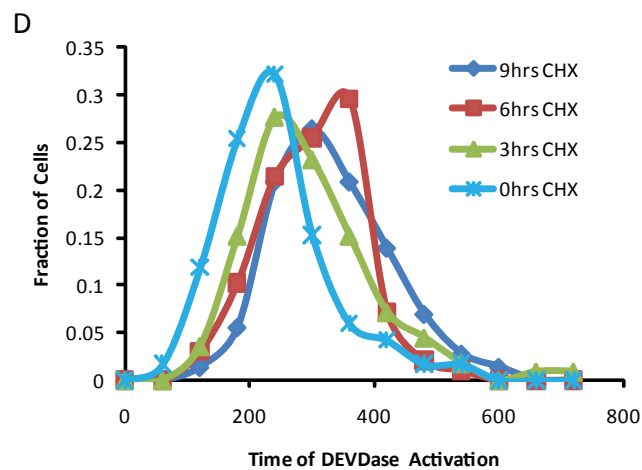

Supplement: supp_122_23_4296__9.pdf [file supp_122_23_4296__9.pdf]
